# Supplementary material for: Efficient photocatalytic oxidation of methane over β-Ga2O3/activated carbon composites
Source: Royal Society of Chemistry journal article supplement (doi:10.1039/c7ra05692c), 2017-01-01
Supplement: c7ra05692c1.pdf [file c7ra05692c1.pdf]

## Electronic Supplementary Information of Manuscript

### Efficient photocatalytic oxidation of methane over $\beta\text{-Ga}_2\text{O}_3$ /activated carbon composites

Jianping Wei,<sup>a</sup> Juan Yang,<sup>\*a,b</sup> Zhihui Wen,<sup>a,b</sup> Jun Dai,<sup>a,b</sup> Yao Li,<sup>a,b</sup> Banghao Yao<sup>a</sup>

<sup>a</sup> State Key Laboratory Cultivation Base for Gas Geology and Gas Control, The Collaborative Innovation Center of coal safety production of Henan, School of Safety Science and Engineering, Henan Polytechnic University, Jiaozuo, 454000, P.R. China

<sup>b</sup> Institute of Chemical Safety, School of Safety Science and Engineering; Department of Applied Chemistry, College of Chemistry and Chemical Engineering, Henan Polytechnic University, Jiaozuo, 454000, P.R. China

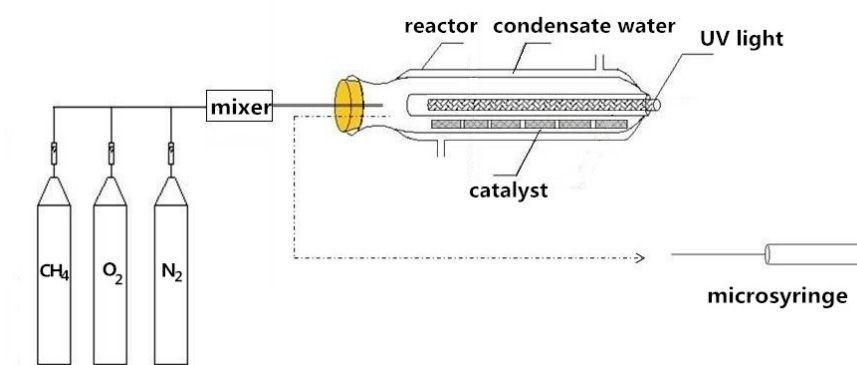

**Fig. S1** The schematic diagram of photocatalytic experimental apparatus. For operation details please see the photocatalytic oxidation of CH<sub>4</sub> in Experimental section.

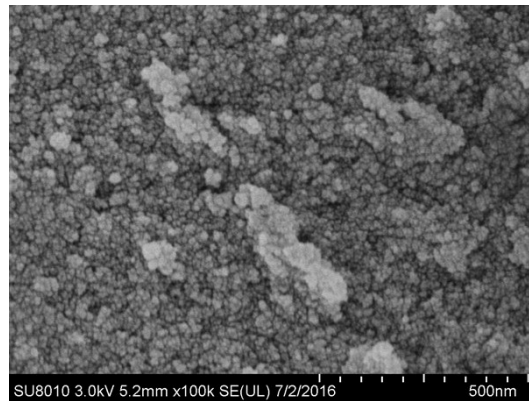

**Fig. S2** SEM image of bare Ga<sub>2</sub>O<sub>3</sub> nanoparticles.

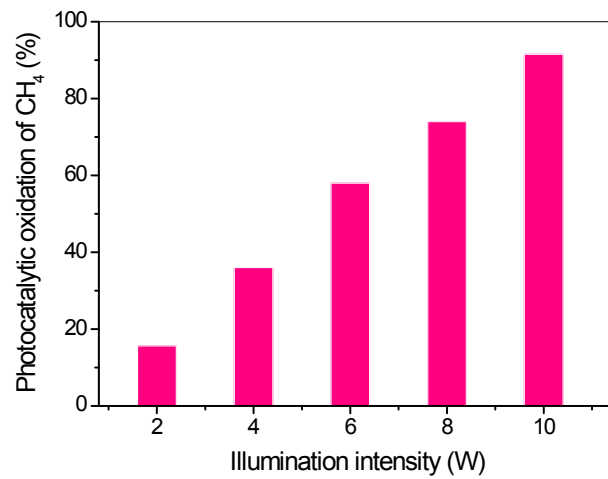

**Fig. S3** The effect of the light intensity on the photocatalytic oxidation of CH<sub>4</sub> over 15%-Ga<sub>2</sub>O<sub>3</sub>/AC sample for 150 min UV irradiation.

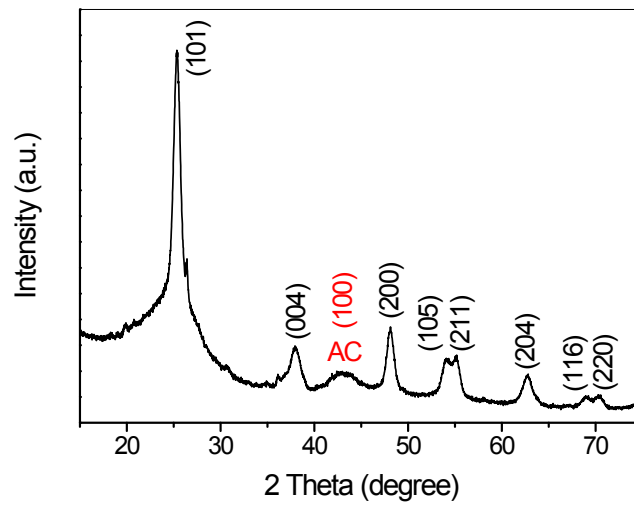

**Fig. S4** XRD pattern of as-prepared 15%-TiO<sub>2</sub>/AC composite.

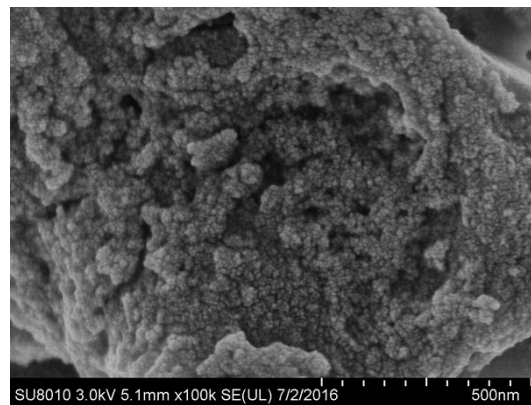

**Fig. S5** SEM image of 15%-TiO<sub>2</sub>/AC composite.

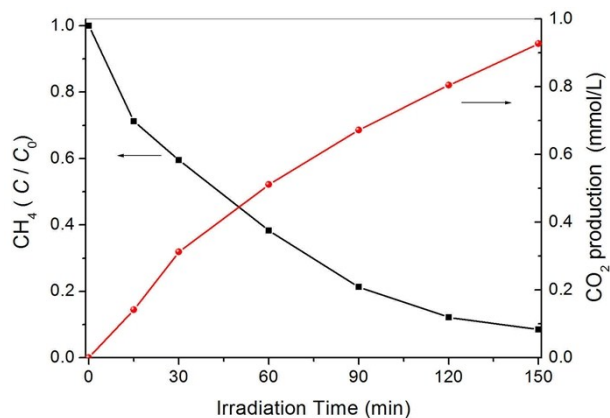

**Fig. S6** The photocatalytic oxidation of CH<sub>4</sub> and the amount of produced CO<sub>2</sub> over 15%-Ga<sub>2</sub>O<sub>3</sub>/AC as a function of irradiation time.

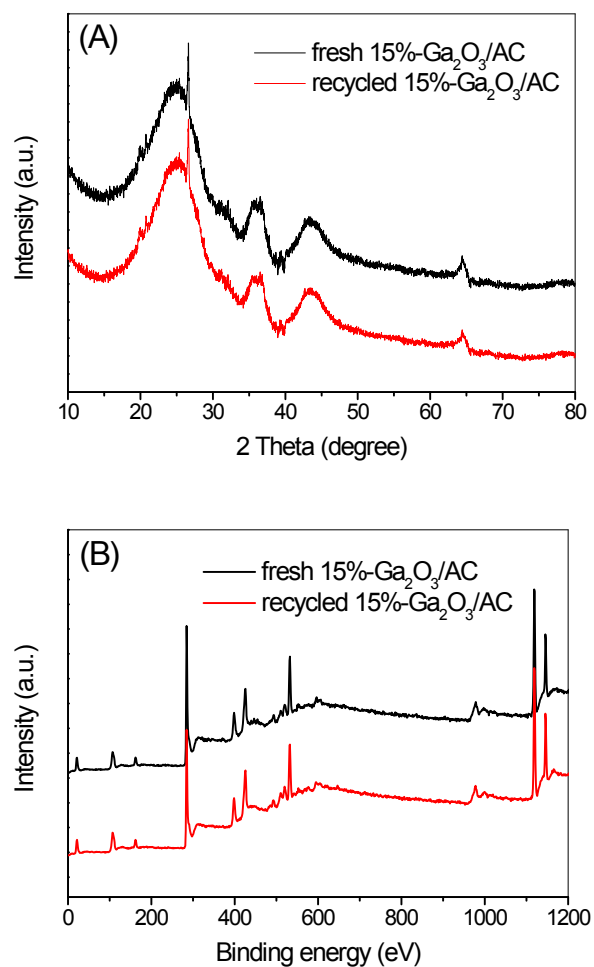

**Fig. S7** (A) XRD patterns and (B) XPS spectra of freshly prepared and recycled 15%-Ga<sub>2</sub>O<sub>3</sub>/AC composite after six consecutive photocatalytic cycles.
